# Supplementary figures and images for: LncRNA ZEB1-AS1 inhibits renal fibrosis in diabetic nephropathy by regulating the miR-217/MAFB axis
Source: Royal Society of Chemistry journal article supplement (doi:10.1039/c9ra05602e), 2019-01-01

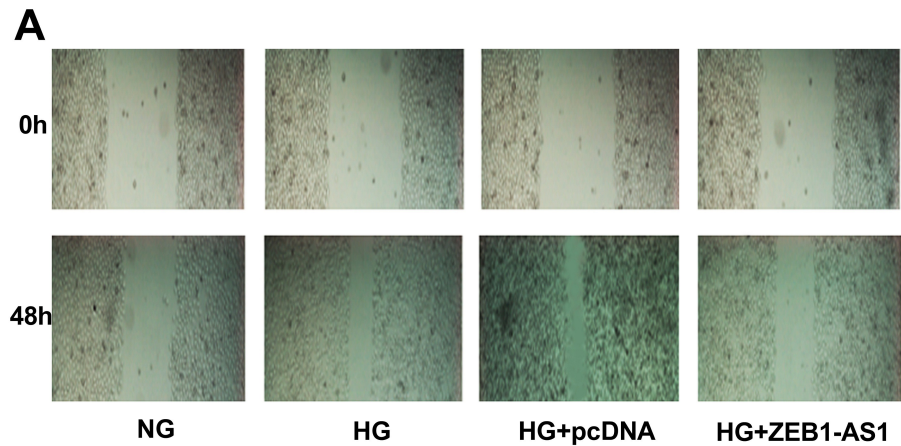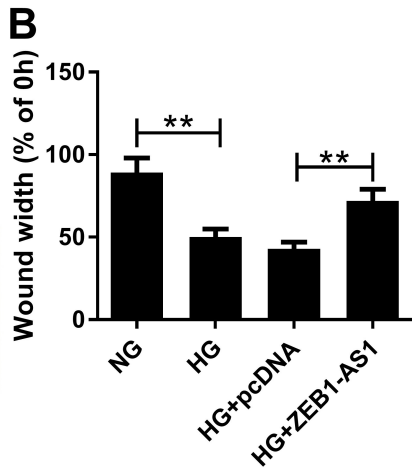

Supplement: c9ra05602e2.pdf [file c9ra05602e2.pdf]
